# Supplementary material for: In situ integration of cobalt diselenide nanoparticles on CNTs realizing durable hydrogen evolution
Source: Royal Society of Chemistry journal article supplement (doi:10.1039/d1ra07301j), 2022-01-01
Supplement: d1ra07301j1.pdf [file d1ra07301j1.pdf]

## Supporting Information

### **In situ integration of cobalt diselenide nanoparticles on CNTs realizing durable hydrogen evolution**

Hongfeng Ye, Xuejiao Zhou, Zhitao Shao, Jing Yao, Wenjie Ma, Lili Wu\*, and

Xinzhi Ma\*

*Key Laboratory for Photonic and Electronic Bandgap Materials, Ministry of Education, School of Physics and Electronic Engineering, Harbin Normal University, Harbin 150025, People's Republic of China.*

---

\* Corresponding authors: E-mail:wll790107@hotmail.com; maxz@hrbnu.edu.cn.

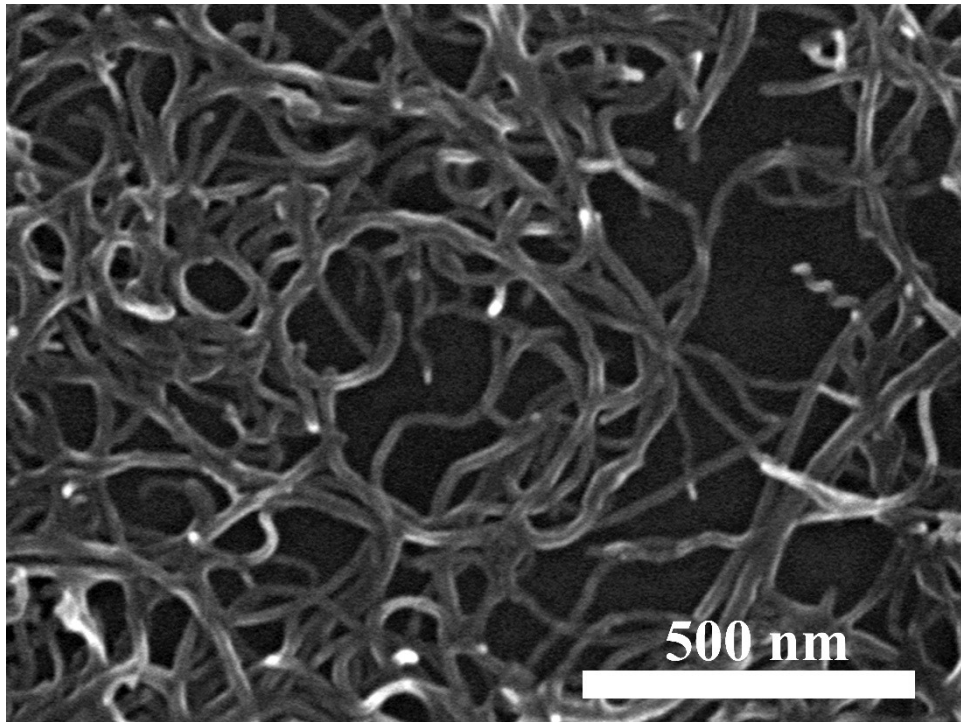

Figure S1. SEM image of CNTs.

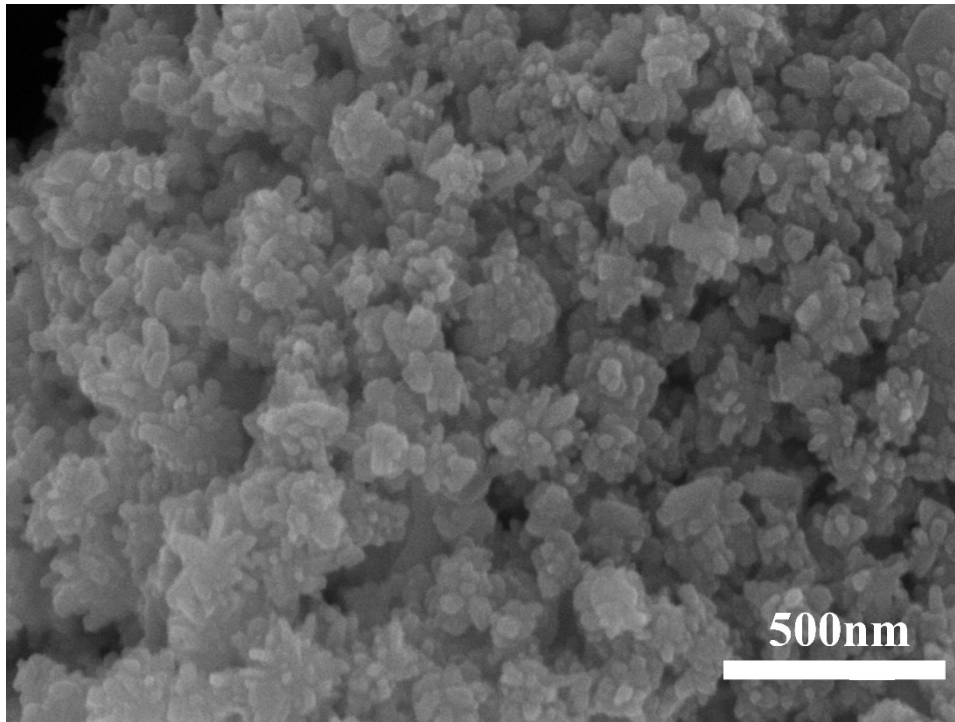

Figure S2. SEM image of pure  $\text{CoSe}_2$ .

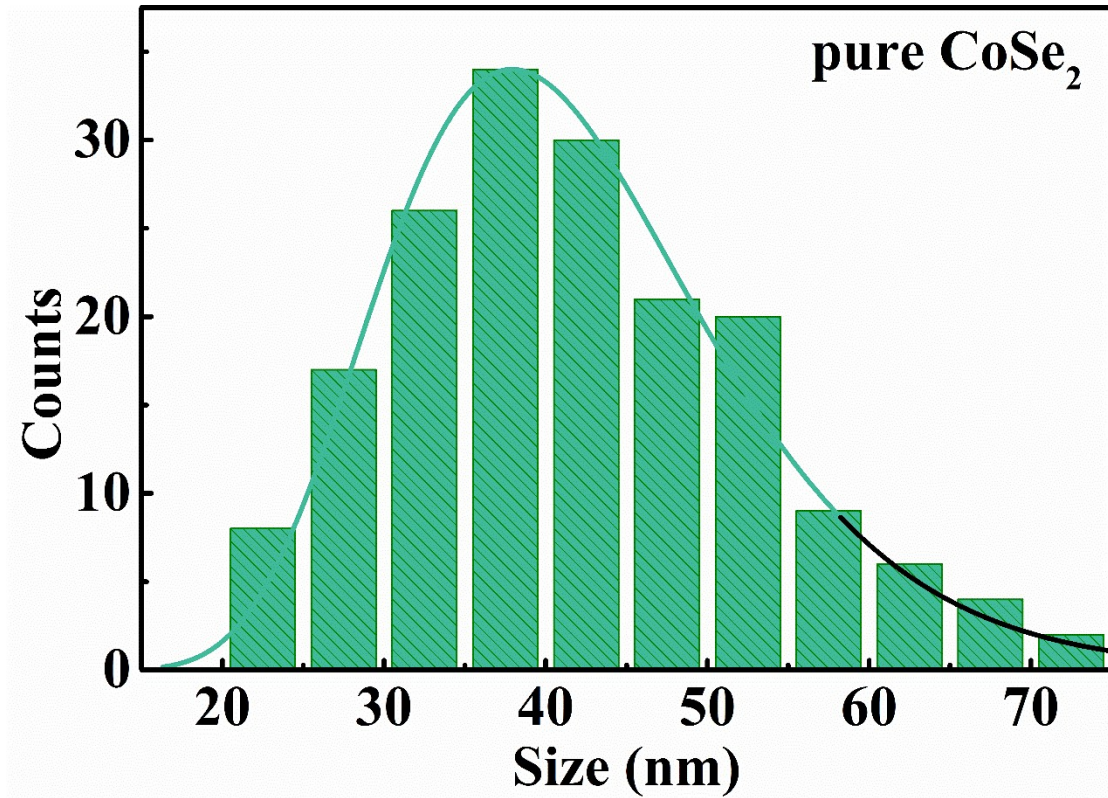

Figure S3. Grain size distribution of CoSe<sub>2</sub> nanoparticles of pure CoSe<sub>2</sub>.

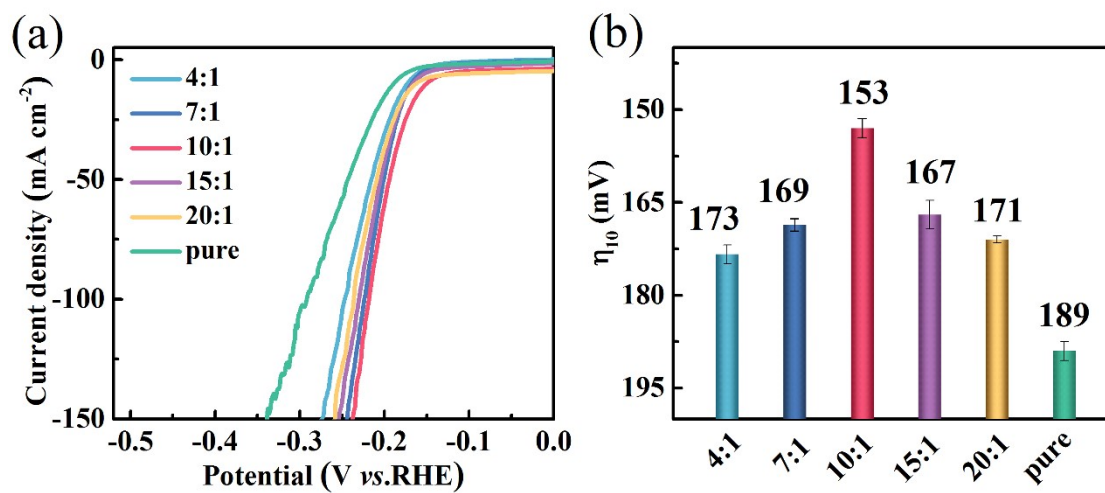

Figure S4. (a) Polarization curves, and (b) histograms error bars of CoSe<sub>2</sub>/CNT with different ratios.

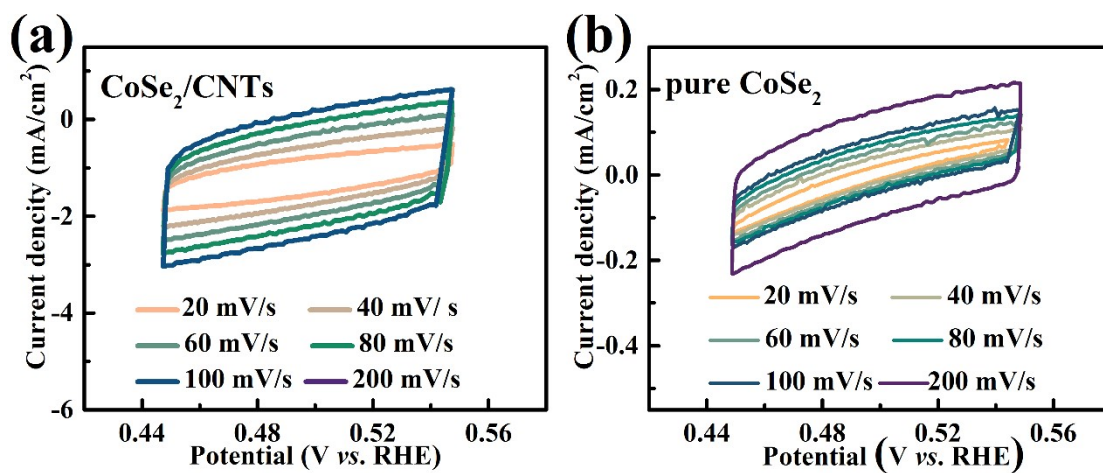

Figure S5. CVs were scanned at various rates from 20 to 200 mV s<sup>-1</sup>: (a) CoSe<sub>2</sub>/CNTs and (b) pure CoSe<sub>2</sub>.

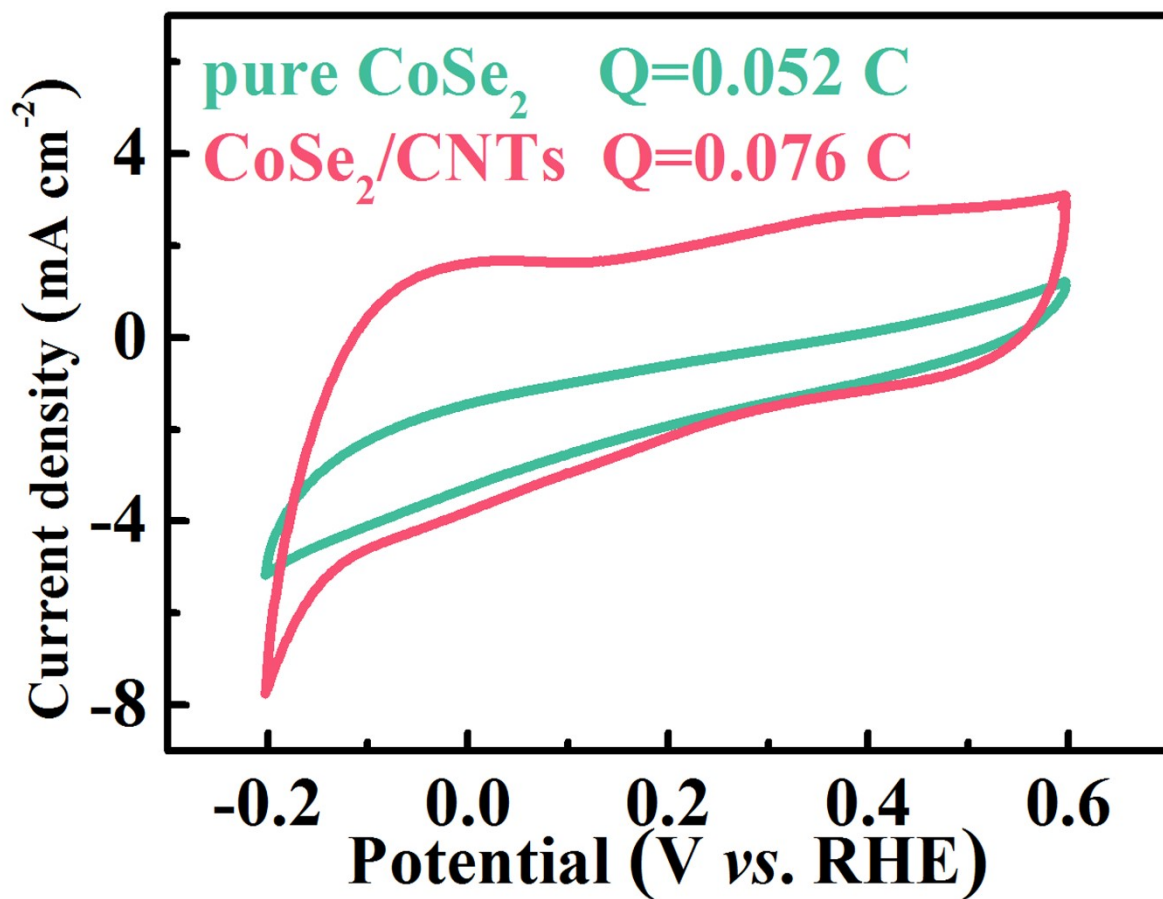

Figure S6. Cyclic voltammetry cycling of Pure CoSe<sub>2</sub> and CoSe<sub>2</sub>/CNTs in pH = 7 phosphate buffer with a scan rate of 50 mV s<sup>-1</sup> range from -0.2 to 0.6 V vs. RHE.

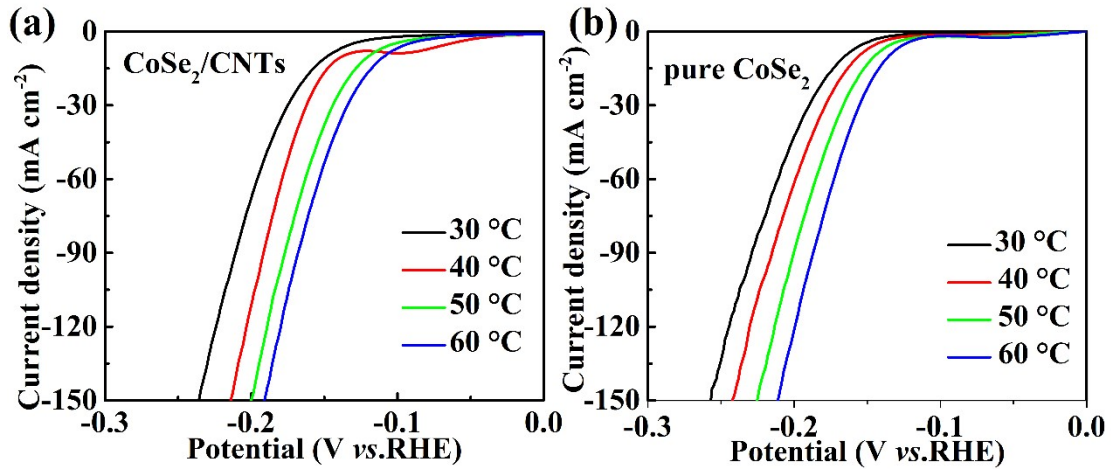

Figure S7. Polarization curves at different temperatures (a) CoSe<sub>2</sub>/CNTs and (b) pure CoSe<sub>2</sub>.

The exchange current density was taken as a function of the reciprocal of temperature, and the activation energy was calculated using the Arrhenius formula<sup>1</sup>:

$$\log j_0 = \log A_i - E_a / (2.3RT) \quad (\text{S1})$$

Where  $A_i$  is the pre-Arrhenius factor. According to the slope of the Arrhenius curve, the  $E_a$  values of pure CoSe<sub>2</sub> and CoSe<sub>2</sub>/CNTs electrocatalysts are 48.043 kJ mol<sup>-1</sup> and 17.342 kJ mol<sup>-1</sup>, respectively.



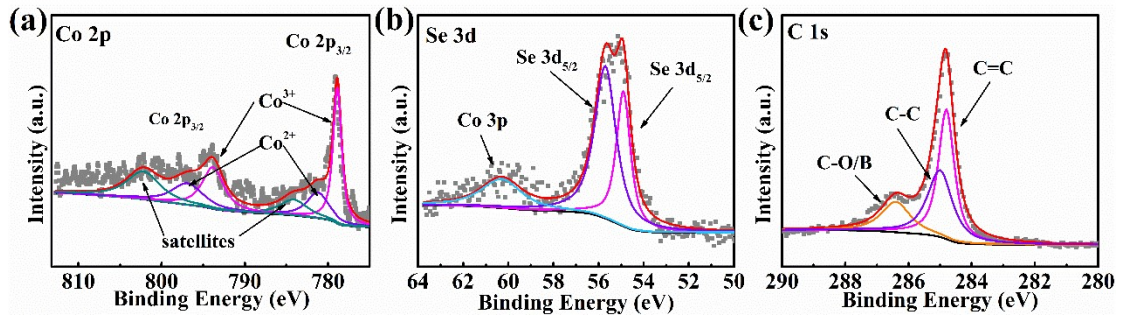

Figure S8. (a) Co 2p, (b) Se 3d and Polarization curves, and (c) B 1s XPS spectra of CoSe<sub>2</sub>/CNT composite after cycling measurement.

In the Se 3d spectra, the SeO<sub>x</sub> characteristic peak at 59.3 eV, caused by the oxidation of a slight excess of metallic selenium, disappears after the long cycle.<sup>2</sup>

Table S1. The stability of CoSe<sub>2</sub>/CNTs in 0.5 M H<sub>2</sub>SO<sub>4</sub> solution compared with other HER catalysts.

| Catalysts                    | $\eta_{10}$ / mV | Stability test conditions (mA cm <sup>-2</sup> ) | Long cycle stability test time (h) | Ref             |
|------------------------------|------------------|--------------------------------------------------|------------------------------------|-----------------|
| CoSe <sub>2</sub> @HC        | 171.7            | 10                                               | 12                                 | 3               |
| CoSe <sub>2</sub> /GD        | /                | 20                                               | 24                                 | 4               |
| CoSe <sub>2</sub>            | 272              | 20                                               | 8                                  | 5               |
| <b>CoSe<sub>2</sub>/CNTs</b> | <b>153</b>       | <b>30</b>                                        | <b>48</b>                          | <b>Our work</b> |

## References

- 1 D. M. F. SANTOS, C. A. C. SEQUEIRA, D. MACCIÒ, A. SACCONI and J. L. FIGUEIREDO, *Int. J. Hydrogen Energy*, 2013, 38, 3137-3145.
- 2 S. K. PARK, J. K. KIM and Y. C. KANG, *Chem. Eng. J.*, 2017, 328, 546-555.
- 3 S. H. YANG, G. D. PARK, J. K. KIM and Y. C. KANG, *Chem. Eng. J.*, 2021, 424, 130341.
- 4 H. X. ZHANG, L. C. LEI and X. W. ZHANG, *RSC Adv.*, 2014, 4, 54344-54348.
- 5 C. L. MCCARTHY, C. A. DOWNES, E. C. SCHUELLER, K. ABUYEN and R. L. BRUTCHEY, *ACS Energy Lett.*, 2016, 1, 607-611.
